# Supplementary material for: Genome-Wide Analysis of the Xyloglucan Endotransglucosylase/Hydrolase (XTH) Gene Family: Expression Pattern during Magnesium Stress Treatment in the Mulberry Plant (Morus alba L.) Leaves
Source: MDPI journal article supplement (doi:10.3390/plants13060902), 2024-03-21
Supplement: s1 [file s1]

Table 2. RT-qPCR primers for the validation of *Morus alba* XTH gene family

| Gene name              | Primer sequence (5'-3')                           |
|------------------------|---------------------------------------------------|
| LOC21401284 (MaXTH-13) | F ACTGGAGAGCCCTATTCGGT<br>R GCCCATGGCTTGGTCTTTTG  |
| LOC21404346 (MaXTH-10) | F TGTGGACGATGTGCCAATCA<br>R TTGCCTTGGGTTCACAGTA   |
| LOC21404263 (MaXTH-6)  | F AAGCTCCTTTCACCTGCCTCC<br>R TGAGGGAAGCGTTTGGAGTC |
| LOC21407360 (MaXTH-21) | F CCAGGACGAGATCGACTTCG<br>R CCTTCTCTCCGCTCCTCTCT  |
| LOC21405692 (MaXTH-1)  | F TTGGGGAATTTGAGTGGCGA<br>R ACGCCGATTGGTTCTGAGTT  |
| LOC21410403 (MaXTH-17) | F AGCACCACCAGTACAGCATC<br>R AAACGACACCACAAAAGGCG  |
